# Supplementary material for: Plausible Precipitation Trends over the Large River Basins of Pakistan in Twenty First Century
Source: MDPI journal article supplement (doi:10.3390/atmos13020190), 2022-01-24
Supplement: s1 [file s1]

# Plausible Precipitation trends in climate zones of large river basins of Pakistan in Twenty First Century

Ammara Nusrat <sup>1\*</sup>, Hamza Farooq Gabriel <sup>1</sup>, Umm e Habiba <sup>1</sup>, Habib Ur Rehman<sup>2</sup>, Sajjad Haider <sup>1</sup>, Shakil Ahmad<sup>1</sup>, Muhammad Shahid<sup>1</sup>, Saad Ahmed Jamal<sup>3</sup> and Jahangir Ali<sup>4</sup>

<sup>1</sup> National University of Sciences and Technology, Islamabad, Pakistan;

<sup>2</sup> University of Engineering and Technology Lahore, Pakistan

<sup>3</sup> Paris Lodron University of Salzburg, Austria

<sup>4</sup> University of Arkansas, Fayetteville, USA

\* Correspondence: ammara.phd14nice@student.nust.edu.pk; Tel: +92-346-5001107

Received: date; Accepted: date; Published: date

**Table S1.** Comparative analysis of APHRODITE and ERA5 monthly dataset. Pearson correlation coefficients and Kolmogorov Smirnov Test results (KS Test). (The shaded p-Values are >0.05, depicting the null hypothesis of similar distribution, is not rejected) [1].

| Gauging Stations | Time Period | Elevation (m) | Correlation Coefficient |      |      | p-Value, KS Test |       |       |
|------------------|-------------|---------------|-------------------------|------|------|------------------|-------|-------|
|                  |             |               | APHRODITE               | ERA5 | GMFD | APHRODITE        | ERA5  | GMFD  |
| Astore           | 1979–2005   | 2546          | 0.90                    | 0.65 | 0.08 | 0.0001           | 0.000 | 0.001 |
| Balakot          | 1979–2005   | 1088          | 0.91                    | 0.77 | 0.17 | 0.018            | 0.069 | 0.000 |
| GarhiDopatta     | 1979–2005   | 819           | 0.90                    | 0.71 | 0.25 | 0.0001           | 0.336 | 0.000 |
| Jhelum           | 1979–2005   | 234           | 0.99                    | 0.79 | 0.31 | 0.99             | 0.000 | 0.238 |
| Kotli            | 1979–2005   | 608           | 0.91                    | 0.83 | 0.26 | 0.29             | 0.568 | 0.079 |
| Mangla           | 1996–2005   | 605           | 0.96                    | 0.77 | 0.40 | 0.74             | 0.519 | 0.060 |
| Muzaffarabad     | 1979–2005   | 737           | 0.92                    | 0.71 | 0.28 | 0.92             | 0.248 | 0.000 |
| Rawalakot        | 2003–2005   | 1638          | 0.95                    | 0.75 | 0.10 | 0.11             | 0.199 | 0.024 |
| Saifulmaluk      | 1996–2005   | 3224          | 0.37                    | 0.52 | 0.13 | 0.0006           | 0.00  | 0.069 |
| Sargodha         | 1979–2005   | 190           | 0.78                    | 0.75 | 0.26 | 0.0002           | 0.000 | 0.002 |
| Sialkot          | 1979–2005   | 256           | 0.91                    | 0.79 | 0.35 | 0.29             | 0.014 | 0.201 |

**Table S2.** Descriptions of the general circulation models (GCMs) used in the study.

| Model      | Organisation                                                                                                               |
|------------|----------------------------------------------------------------------------------------------------------------------------|
| ACCESS1-0  | CSIRO (Commonwealth Scientific and Industrial Research Organisation, Australia) and BOM (Bureau of Meteorology, Australia) |
| BCC-CSM1-1 |                                                                                                                            |
| BNU-ESM    | Beijing Climate Center, China Meteorological Administration                                                                |
| CanESM2    | College of Global Change and Earth System Science, Beijing Normal University                                               |
| CCSM4      | Canadian Centre for Climate Modelling and Analysis                                                                         |
| CESM1-BGC  | National Center for Atmospheric Research                                                                                   |
|            | National Science Foundation, Department of Energy, National Center for Atmospheric Research                                |

|                    |                                                                                                                                                                                 |
|--------------------|---------------------------------------------------------------------------------------------------------------------------------------------------------------------------------|
| CNRM-CM5           | Centre National de Recherches Météorologiques/Centre Européen de<br>Recherche et Formation Avancées en Calcul Scientifique                                                      |
| CSIRO-MK3-6-0      | Commonwealth Scientific and Industrial Research Organisation in<br>collaboration with the Queensland Climate Change Centre of Excellence                                        |
| GFDL-CM3           | NOAA's Geophysical Fluid Dynamics Laboratory                                                                                                                                    |
| GFDL-ESM2G         | NOAA's Geophysical Fluid Dynamics Laboratory                                                                                                                                    |
| GFDL-ESM2M         | NOAA's Geophysical Fluid Dynamics Laboratory                                                                                                                                    |
| INMCM4             | Institute for Numerical Mathematics, Moscow, Russia                                                                                                                             |
| IPSL-CM5A-LR       | Institut Pierre-Simon Laplace                                                                                                                                                   |
| IPSL-CM5A-MR       | Institut Pierre-Simon Laplace                                                                                                                                                   |
| MIROC-ESM          | Japan Agency for Marine-Earth Science and Technology, Atmosphere and<br>Ocean Research Institute (The University of Tokyo), and National Institute for<br>Environmental Studies |
| MIROC-ESM-<br>CHEM | Japan Agency for Marine-Earth Science and Technology, Atmosphere and<br>Ocean Research Institute (The University of Tokyo), and National Institute for<br>Environmental Studies |
| MIROC5             | Japan Agency for Marine-Earth Science and Technology, Atmosphere and<br>Ocean Research Institute (The University of Tokyo), and National Institute for<br>Environmental Studies |
| MPI-ESM-LR         | Max Planck Institute for Meteorology (MPI-M)                                                                                                                                    |
| MPI-ESM-MR         | Max Planck Institute for Meteorology (MPI-M)                                                                                                                                    |
| MRI-CGCM3          | Meteorological Research Institute                                                                                                                                               |
| NorESM1-M          | Norwegian Climate Centre                                                                                                                                                        |

---

**Table S3.** Selected GCMs using RCP 4.5 and climate Zones for seasons warm wet cold dry cold wet and warm dry

| Zones | Warm Wet                                                                      | Cold Dry                                                      | Cold Wet                                                                                       | Warm Dry                                                                            |
|-------|-------------------------------------------------------------------------------|---------------------------------------------------------------|------------------------------------------------------------------------------------------------|-------------------------------------------------------------------------------------|
| 1     | BNU-ESM, GFDL-ESM2G, MIROC-ESM, MRI-CGCM3                                     | CSIRO, MPI-ESM-MR, MIROC-ESM, MRI-CGCM3                       | GFDL-ESM2M, MPI-ESM-MR, MIROC-ESM, CESM, CNRM5, MRI-CGCM3                                      | bcc-csm1, ACCESS, MIROC-ESM-CHEM, MPI-ESM-MR, CSIRO, GFDL-ESM2G, MRI-CGCM3, NorESM1 |
| 2     | BNU-ESM, ACCESS, MPI-ESM-MR, MPI-ESM-LR, MIROC-ESM                            | MRI-CGCM3, CCSM4, MIROC-ESM-CHEM, MIROC5, CSIRO               | ACCESS, BNU-ESM, CCSM4, CESM, CNRM5, CSIRO, NorESM1                                            | ACCESS, CSIRO, MIROC5, MIROC-ESM-CHEM, CCSM4, CESM                                  |
| 3     | MRI-CGCM3, bcc-csm1, MIROC-ESM, MIROC-ESM-CHEM, CSIRO, MPI-ESM-MR, MPI-ESM-LR | ACCESS, CESM, BNU-ESM, CCSM4, IPSL-CM5A-LR                    | ACCESS, MIROC-ESM-CHEM, MIROC-ESM, CanESM-2, CCSM4, CESM, CNRM5, MPI-ESM-MR, CSIRO, GFDL-ESM2M | MIROC-ESM-CHEM, NorESM1, MPI-ESM-LR, GFDL-ESM2G                                     |
| 4     | ACCESS, CCSM4, MIROC-ESM, MRI-CGCM3, BNU-ESM, MIROC5                          | MPI-ESM-MR, GFDL-ESM2G, MIROC-ESM-CHEM, MRI-CGCM3             | GFDL-ESM2M, CSIRO, MIROC-ESM, CESM, CNRM5, MRI-CGCM3                                           | MIROC-ESM-CHEM, ACCESS, BNU-ESM, bcc-csm1, CESM, CNRM5, CSIRO                       |
| 5     | MIROC5, MPI-ESM-LR, MIROC-ESM, BNU-ESM, MRI-CGCM3                             | inmcm4, CCSM4, CanESM-2, GFDL-ESM2M, CSIRO, MIROC5, MRI-CGCM3 | CESM, MPI-ESM-MR, GFDL-ESM2M, MIROC-ESM, bcc-csm1                                              | ACCESS, GFDL-ESM2G, CCSM4, BNU-ESM, CanESM-2                                        |
| 6     | NorESM1, ACCESS, MIROC-ESM-CHEM, CSIRO, CCSM4                                 | ACCESS, GFDL-ESM2G, MIROC-ESM, MPI-ESM-MR, BNU-ESM            | ACCESS, MPI-ESM-MR, bcc-csm1, BNU-ESM, CCSM4                                                   | CNRM5, MIROC-ESM, MIROC-ESM-CHEM, MIROC5, CanESM-2                                  |
| 7     | MRI-CGCM3, GFDL-ESM2M, MIROC-ESM-CHEM, MIROC5, BNU-ESM                        | MIROC-ESM-CHEM, CSIRO, CESM, NorESM1, BNU-ESM, CCSM4          | CanESM-2, CSIRO, bcc-csm1, CCSM4, CNRM5, MRI-CGCM3, CESM                                       | MIROC5, CNRM5, MIROC-ESM, MRI-CGCM3                                                 |
| 8     | BNU-ESM, MIROC-ESM-CHEM, CSIRO, CCSM4, CanESM-2                               | CESM, CNRM5, MIROC-ESM-CHEM, MRI-CGCM3                        | CESM, CNRM5, GFDL-ESM2M, MIROC-ESM                                                             | CSIRO, NorESM1, MIROC-ESM-CHEM, MRI-CGCM3                                           |
| 9     | bcc-csm1, CNRM5, MIROC-ESM-CHEM, CSIRO, inmcm4, MPI-ESM-LR                    | NorESM1, MIROC-ESM-CHEM, inmcm4, bcc-csm1, BNU-ESM            | bcc-csm1, BNU-ESM, CNRM5, CCSM4, CESM, CSIRO                                                   | MPI-ESM-MR, ACCESS, bcc-csm1, BNU-ESM, CNRM5, CCSM4, CESM, CSIRO                    |
| 10    | MIROC5, MIROC-ESM, MRI-CGCM3                                                  |                                                               |                                                                                                | MIROC5, NorESM1, MIROC-ESM-CHEM, MRI-CGCM3                                          |
| 11    | CSIRO, CNRM5, MIROC-ESM, BNU-ESM, CCSM4, CanESM-2                             |                                                               |                                                                                                |                                                                                     |
| 12    | bcc-csm1, inmcm4, MIROC-ESM, BNU-ESM, MRI-CGCM3                               |                                                               |                                                                                                |                                                                                     |

**Table S4:** Selected GCMs using RCP 8.5 scenarios for seasons Warm Wet, Cold Dry, Cold Wet and Warm Dry

| Zones | Warm Wet                                      | Cold Dry                                                 | Cold Wet                                           | Warm Dry                                     |
|-------|-----------------------------------------------|----------------------------------------------------------|----------------------------------------------------|----------------------------------------------|
| 1     | bcc-csm1, MPI-ESM-MR, ACCESS, MIROC5          | MIROC-ESM<br>GFDL-ESM2G, BNU-ESM,<br>MRI-CGCM3, bcc-csm1 | CanESM-2, CCSM4,<br>ACCESS, MRI-CGCM3              | MRI-CGCM3, CESM,<br>MPI-ESM-LR, GFDL-<br>CM3 |
| 2     | IPSL-CM5A-MR, MPI-ESM-MR, CanESM-2, MIROC5    | ACCESS, BNU-ESM, IPSL-CM5A-LR, CanESM-2                  | CNRM5, GFDL-ESM2G, ACCESS, MRI-CGCM3               | MIROC5, GFDL-ESM2M, MPI-ESM-LR, MRI-CGCM3    |
| 3     | MRI-CGCM3                                     | MIROC-ESM-CHEM, inmcm4, ACCESS, CanESM-2                 | NorESM1, bcc-csm1, ACCESS, MRI-CGCM3               | MRI-CGCM3, CESM, MPI-ESM-LR, GFDL-CM3        |
| 4     | MRI-CGCM3, IPSL-CM5A-MR, ACCESS, MIROC5       | MIROC5, GFDL-ESM2G, ACCESS, CanESM-2                     | MIROC-ESM-CHEM, CNRM5, ACCESS, MRI-CGCM3           | MRI-CGCM3, BNU-ESM, ACCESS, MIROC5           |
| 5     | GFDL-ESM2M, inmcm4, CanESM-2, MIROC5          | bcc-csm1, CNRM5, ACCESS, BNU-ESM, CanESM-2               | MIROC5, GFDL-ESM2M, ACCESS, MRI-CGCM3              | CSIRO, CCSM4, ACCESS, MIROC5                 |
| 6     | MRI-CGCM3, MPI-ESM-MR, MPI-ESM-LR, MIROC5     | bcc-csm1, MIROC-ESM, ACCESS, CNRM5                       | MIROC5, GFDL-ESM2M, ACCESS, MRI-CGCM3              | CSIRO, IPSL-CM5A-MR, MPI-ESM-LR, MIROC5      |
| 7     | CanESM-2, CESM, GFDL-CM3, MIROC5              | ACCESS, BNU-ESM, bcc-csm1, MIROC-ESM, MPI-ESM-LR         | CNRM5, inmcm4, ACCESS, CanESM-2, MIROC5, MRI-CGCM3 | GFDL-ESM2M, NorESM1, ACCESS, MRI-CGCM3       |
| 8     | CNRM5, MIROC-ESM-CHEM, GFDL-ESM2M, MIROC5     | MIROC-ESM, GFDL-ESM2M, CNRM5                             | CNRM5, ACCESS, MIROC5, GFDL-ESM2M                  | MIROC5, CNRM5, ACCESS, MRI-CGCM3             |
| 9     | CCSM4, MPI-ESM-MR, GFDL-ESM2M, BNU-ESM, CNRM5 | MIROC5, MIROC-ESM, CNRM5                                 | MIROC5, inmcm4, ACCESS, MRI-CGCM3                  | GFDL-CM3, CanESM-2, ACCESS, MRI-CGCM3        |
| 10    | CanESM-2, GFDL-ESM2G, GFDL-CM3, MIROC5        |                                                          |                                                    | MIROC5, CCSM4, ACCESS, MRI-CGCM3             |
| 11    | GFDL-ESM2M, MIROC-ESM, ACCESS, MIROC5         |                                                          |                                                    |                                              |
| 12    | CanESM-2, CSIRO, ACCESS, MIROC5               |                                                          |                                                    |                                              |

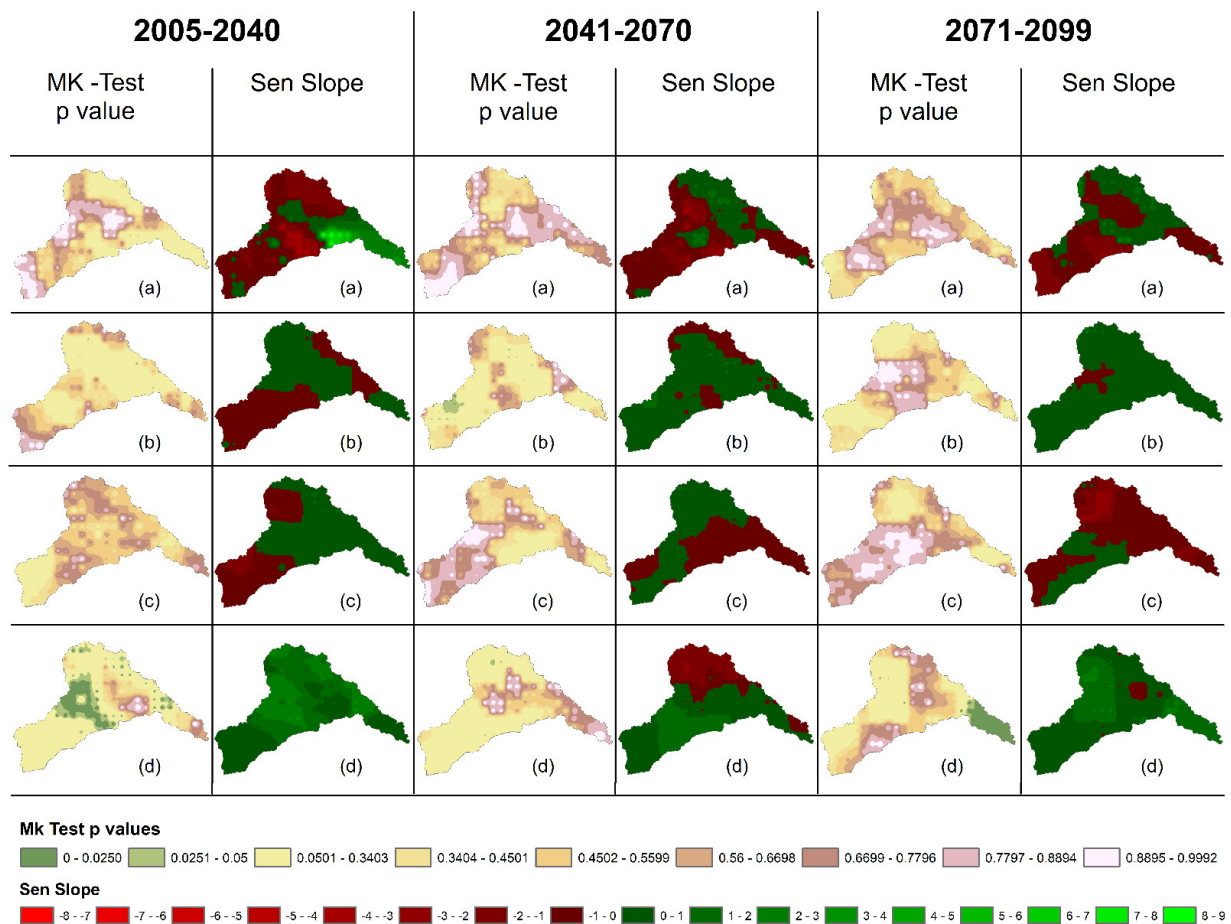

**Figure S1.** Mann Kendall trend detection and Sen's slope results for MME-Mean using RCP 4.5 (a) Warm Wet (b) Cold Dry (c) Cold Wet (d) Warm Dry

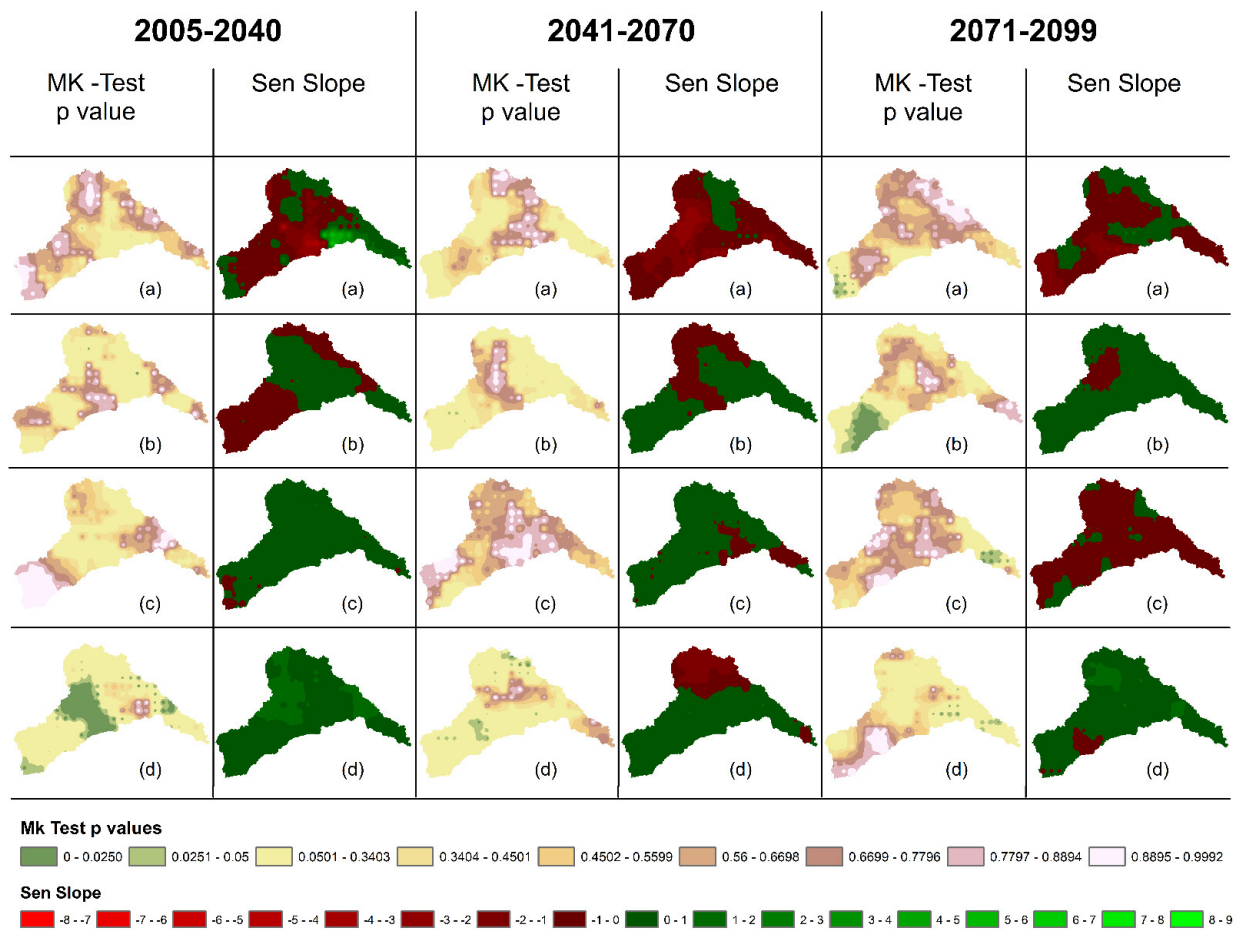

**Figure S2.** Mann Kendall trend detection and Sen's Slope results for MME-Median using RCP 4.5 (a) Warm Wet (b) Cold Dry (c) Cold Wet (d) Warm Dry

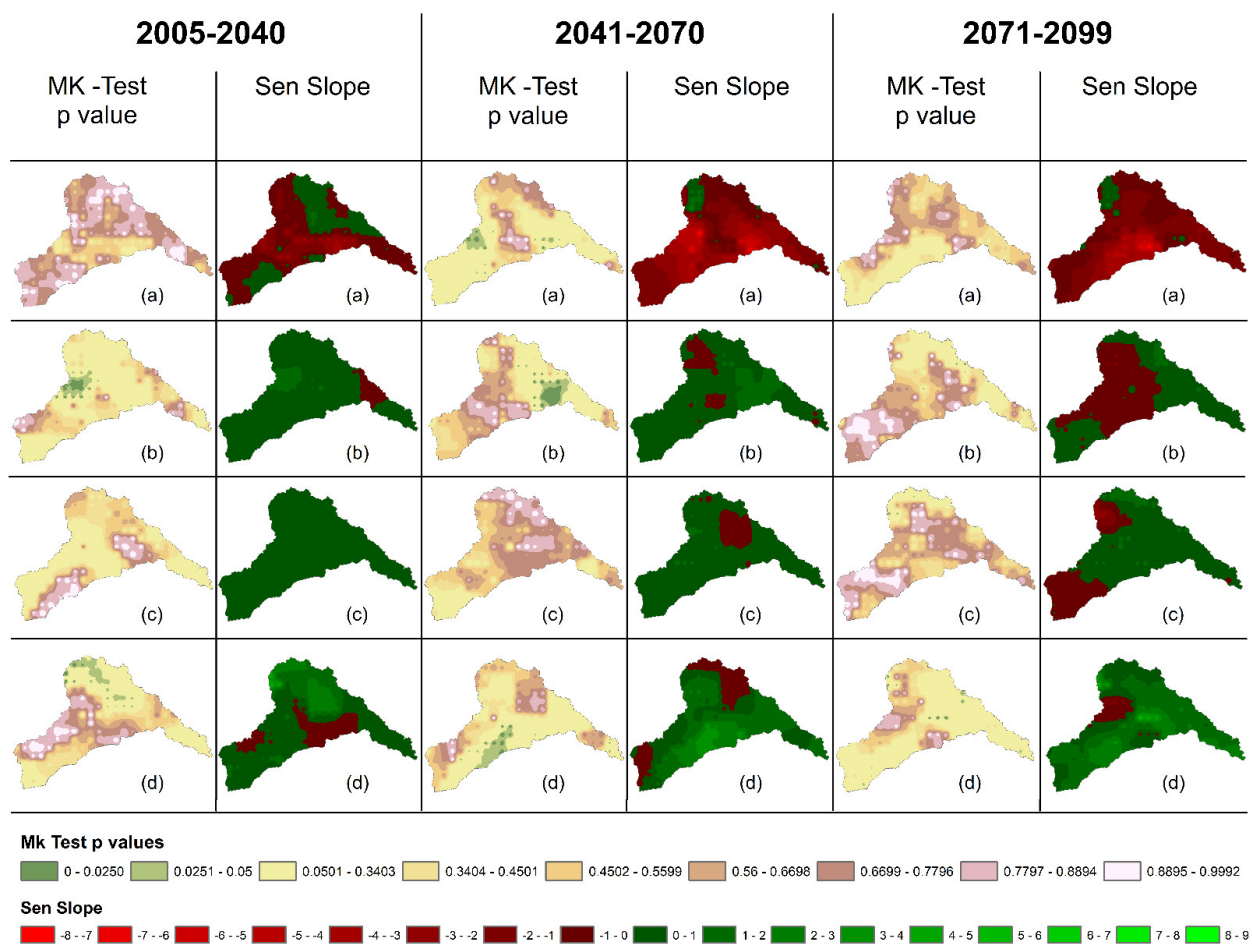

**Figure S3.** Mann Kendall trend detection and Sen's slope results for MME-Mean using RCP 8.5 (a) Warm Wet (b) Cold Dry (c) Cold Wet (d) Warm Dry

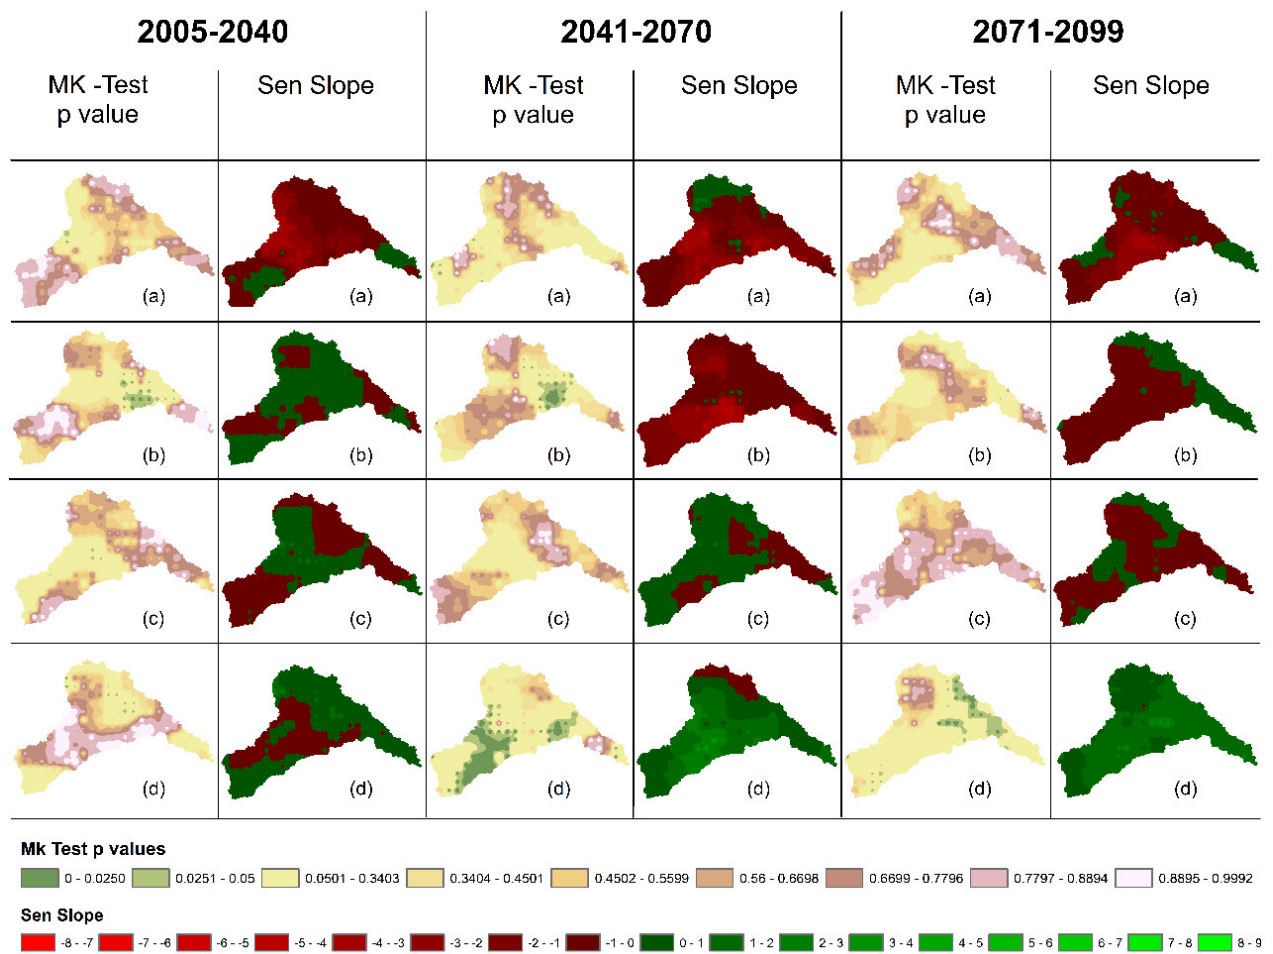

**Figure S4.** Mann Kendall trend detection and Sen's slope results for MME-Median using RCP 8.5 (a) Warm Wet (b) Cold Dry (c) Cold Wet (d) Warm Dry

1. Nusrat, A.; Gabriel, H.F.; Haider, S.; Ahmad, S.; Shahid, M.; Ahmed Jamal, S. Application of Machine Learning Techniques to Delineate Homogeneous Climate Zones in River Basins of Pakistan for Hydro-Climatic Change Impact Studies. *Applied Sciences* **2020**, *10*, 6878.
